# Supplementary material for: Improving In Vitro Culture of Human Male Fetal Germ Cells
Source: MDPI journal article supplement (doi:10.3390/cells10082033), 2021-08-09
Supplement: s1 [file s1]

Supplementary Materials:

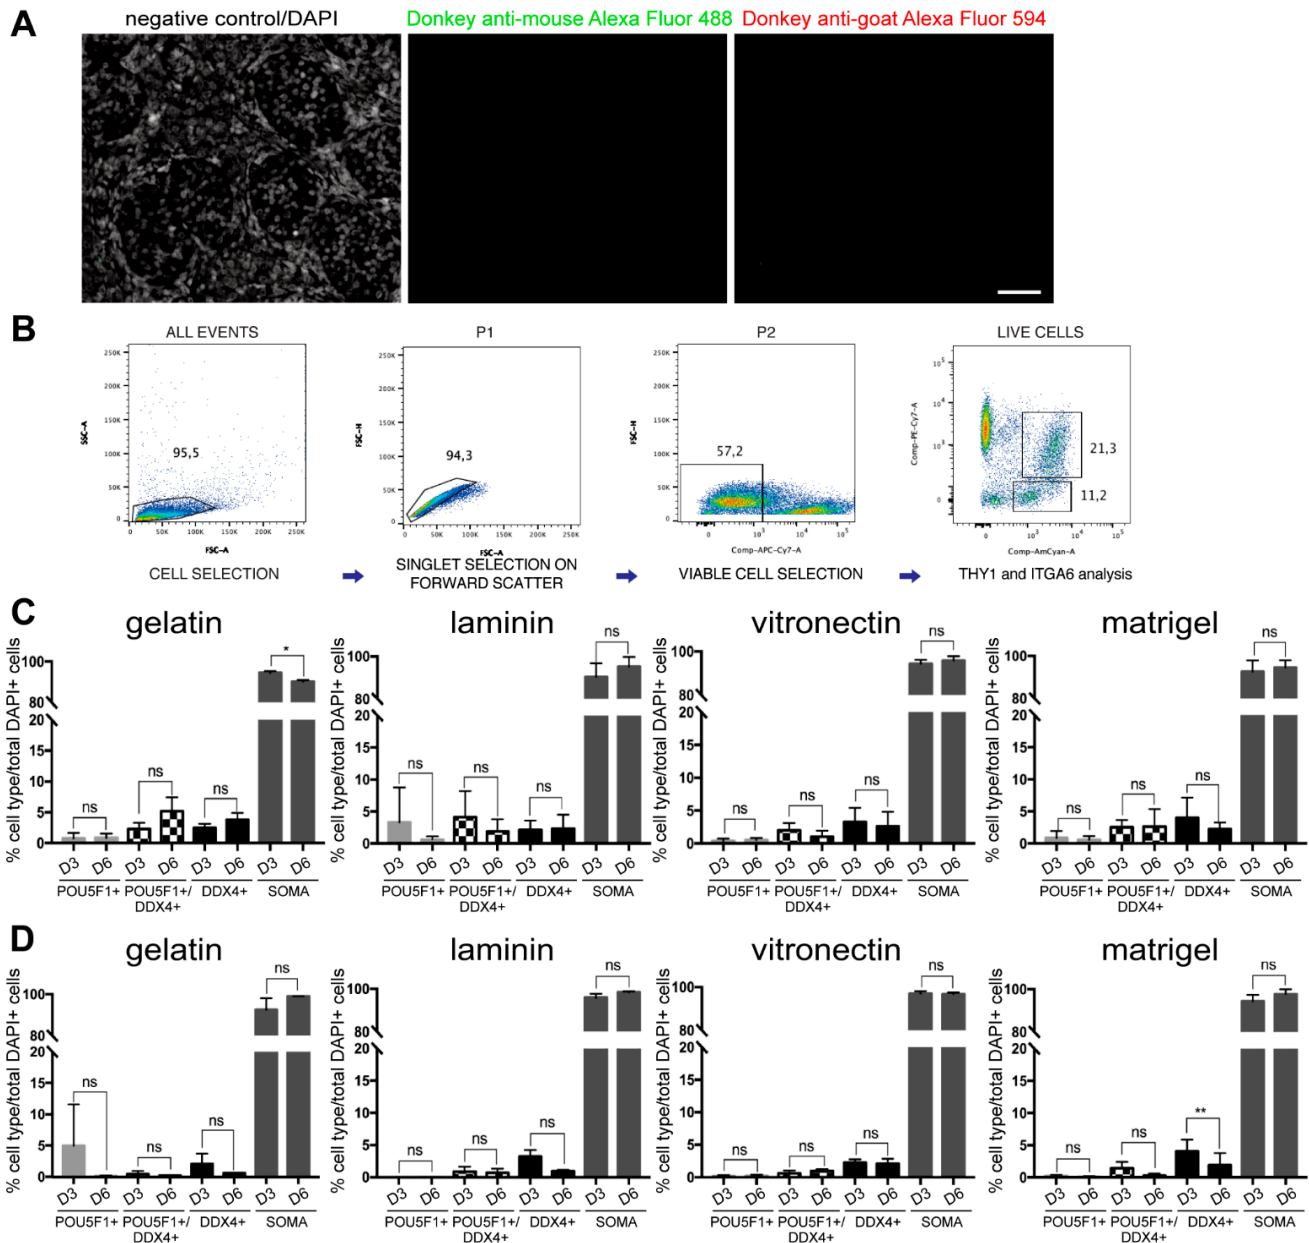

**Supplementary Figure S1. Negative controls, FACS gating strategy and visualization associated with Table 1.** **A)** Negative control for the immunofluorescence using secondary antibodies only in male gonads of 16.5 WPF. Scale bar: 50  $\mu$ m. **B)** FACS gating strategy showing representative dot-plots for the gates used to select population 1 (P1), singlets (P2), viable cells and finally the expression analysis of THY1 and ITGA6. **C)** Percentage hFGCs and gonadal somatic cells per DAPI+ cells (N=3 donors) after culture for D3 and D6 in Shinohara-medium on the different substrates (mean  $\pm$  SD). **D)** Percentage of hFGCs and gonadal somatic cells cells per DAPI+ cells (N=2 donors) after culture for D3 and D6 in Zhou-medium on the different substrates (mean  $\pm$  SD). Statistical analysis was performed using the t-test. The graphs are a visualization of the mean percentages shown in Table 1.

**Table S1.** List of antibodies used in this study.

| Antibody                           | Company (Cat. no.)                  | Dilution                |
|------------------------------------|-------------------------------------|-------------------------|
| goat anti-DDX4 (VASA)              | R&D Systems (AF2030)                | IHC, 1:500; ICC, 1:1000 |
| mouse anti-POU5F1 (OCT3/4)         | Santa Cruz Biotechnologies (SC5279) | IHC, 1:50; ICC, 1:100   |
| LIVE/DEAD APC.Cy7(viability)       | Invitrogen (L-34975)                | FC, 1:1000              |
| mouse anti-CD90 (THY1) PE.Cy7      | BD Biosciences (561558)             | FC, 1:50                |
| rat anti-CD49f (ITGA6) BV510       | BD Biosciences (563271)             | FC, 1:50                |
| rabbit anti-Ki67                   | Epredia (RM-9106-S0)                | IHC, 1:500; ICC, 1:500  |
| donkey anti-mouse Alexa fluor 647  | Invitrogen (A-31571)                | IHC, 1:500; ICC, 1:500  |
| donkey anti-goat Alexa fluor 546   | Invitrogen (A-11056)                | IHC, 1:500; ICC, 1:500  |
| donkey anti-rabbit Alexa fluor 488 | Invitrogen (A-21206)                | IHC, 1:500; ICC, 1:500  |
| donkey anti-mouse Alexa fluor 488  | Invitrogen (A-21202)                | IHC, 1:500; ICC, 1:500  |
| donkey anti-goat Alexa fluor 594   | Invitrogen (A-11058)                | IHC, 1:500; ICC, 1:500  |

ICC, immunocytochemistry; IHC, immunohistochemistry; FC, flow cytometry; Cat. No., catalogue number.

**Table S2.** Total number of DAPI+ cells counted in each biological donor (associated with Table 1).

|                                                                               | donor 1 | donor 2 | donor 3 | Mean DAPI+ cells $\pm$ SD |
|-------------------------------------------------------------------------------|---------|---------|---------|---------------------------|
| <b>Shinohara-medium, with EGF, FGF2, GDNF, LIF, estrogen and progesterone</b> |         |         |         |                           |
| <b>D3</b>                                                                     |         |         |         |                           |
| gelatin                                                                       | 395     | 1172    | 809     | 792,0 $\pm$ 388,8         |
| laminin                                                                       | 792     | 672     | 2314    | 1259,3 $\pm$ 915,3        |
| matrigel                                                                      | 2026    | 804     | 448     | 2252,3 $\pm$ 356,6        |
| vitronectin                                                                   | 1847    | 2518    | 2392    | 1092,7 $\pm$ 827,7        |
| <b>D6</b>                                                                     |         |         |         |                           |
| gelatin                                                                       | 2839    | 1934    | 1312    | 2028,3 $\pm$ 767,9        |
| laminin                                                                       | 2127    | 1486    | 5180    | 2931,0 $\pm$ 1973,9       |
| matrigel                                                                      | 3544    | 1880    | 1569    | 1405,0 $\pm$ 694,3        |
| vitronectin                                                                   | 2147    | 1297    | 771     | 2331,0 $\pm$ 1061,9       |
| <b>Zhou-medium (adapted), with RA, BMP4 and ActA</b>                          |         |         |         |                           |
| <b>D3</b>                                                                     |         |         |         |                           |
| gelatin                                                                       | 673     | 1448    |         | 1060,5 $\pm$ 548,0        |
| laminin                                                                       | 1348    | 509     |         | 928,5 $\pm$ 593,3         |
| matrigel                                                                      | 1347    | 1427    |         | 1148,5 $\pm$ 7,8          |
| vitronectin                                                                   | 1143    | 1154    |         | 1387,0 $\pm$ 56,6         |
| <b>D6</b>                                                                     |         |         |         |                           |
| gelatin                                                                       | 471     | 1235    |         | 853,0 $\pm$ 540,2         |
| laminin                                                                       | 3125    | 542     |         | 1833,5 $\pm$ 1826,5       |
| matrigel                                                                      | 3231    | 2407    |         | 1955,5 $\pm$ 170,4        |
| vitronectin                                                                   | 2076    | 1835    |         | 2819,0 $\pm$ 582,7        |
